# Supplementary material for: Preliminary SAR of Novel Pleuromutilin–Polyamine Conjugates
Source: MDPI journal article supplement (doi:10.3390/microorganisms11112791), 2023-11-17
Supplement: s1 [file s1]

# Supplementary Materials

## Preliminary SAR of Novel Pleuromutilin-Polyamine Conjugates

Kenneth Sue <sup>1</sup>, Melissa M. Cadelis <sup>1,2</sup>, Kerrin Hainsworth <sup>1</sup>, Florent Rouvier <sup>3</sup>, Marie-Lise Bourguet-Kondracki <sup>4</sup>, Jean Michel Brunel <sup>3</sup> and Brent R. Copp <sup>1,\*</sup>

<sup>1</sup> School of Chemical Sciences, The University of Auckland, Private Bag 92019, Auckland 1142, New Zealand

<sup>2</sup> School of Medical Sciences, The University of Auckland, Private Bag 92019, Auckland 1142, New Zealand

<sup>3</sup> Membranes et Cibles Thérapeutiques, INSERM, Aix-Marseille Université, 27 bd Jean Moulin, 13385 Marseille, France

<sup>4</sup> Laboratoire Molécules de Communication et Adaptation des Micro-organismes, UMR 7245 CNRS, Muséum National d'Histoire Naturelle, 57 rue Cuvier (C.P. 54), 75005 Paris, France

\* Correspondence: b.copp@auckland.ac.nz

### Contents

|                                                                                                                                                                                                                                        |           |
|----------------------------------------------------------------------------------------------------------------------------------------------------------------------------------------------------------------------------------------|-----------|
| <b>Figure S1</b> <sup>1</sup> H (CDCl <sub>3</sub> , 400 MHz) and <sup>13</sup> C (CDCl <sub>3</sub> , 100 MHz) NMR spectra for <b>2</b> .                                                                                             | <b>S2</b> |
| <b>Figure S2</b> <sup>1</sup> H (DMSO- <i>d</i> <sub>6</sub> , 400 MHz) and <sup>13</sup> C (DMSO- <i>d</i> <sub>6</sub> , 100 MHz) NMR spectra for <b>9a</b> .                                                                        | <b>S3</b> |
| <b>Figure S3</b> <sup>1</sup> H (DMSO- <i>d</i> <sub>6</sub> , 400 MHz) and <sup>13</sup> C (DMSO- <i>d</i> <sub>6</sub> , 100 MHz) NMR spectra for <b>9b</b> .                                                                        | <b>S4</b> |
| <b>Figure S4</b> <sup>1</sup> H (DMSO- <i>d</i> <sub>6</sub> , 400 MHz) and <sup>13</sup> C (DMSO- <i>d</i> <sub>6</sub> , 100 MHz) NMR spectra for <b>9c</b> .                                                                        | <b>S5</b> |
| <b>Figure S5</b> <sup>1</sup> H (DMSO- <i>d</i> <sub>6</sub> , 400 MHz) and <sup>13</sup> C (DMSO- <i>d</i> <sub>6</sub> , 100 MHz) NMR spectra for <b>9d</b> .                                                                        | <b>S6</b> |
| <b>Figure S6</b> <sup>1</sup> H (DMSO- <i>d</i> <sub>6</sub> , 400 MHz) and <sup>13</sup> C (DMSO- <i>d</i> <sub>6</sub> , 100 MHz) NMR spectra for <b>9e</b> .                                                                        | <b>S7</b> |
| <b>Figure S7</b> <sup>1</sup> H (DMSO- <i>d</i> <sub>6</sub> , 500 MHz) and <sup>13</sup> C (DMSO- <i>d</i> <sub>6</sub> , 125 MHz) NMR spectra for <b>9f</b> .                                                                        | <b>S8</b> |
| <b>Figure S8</b> Bacterial growth inhibition exhibited by <b>2</b> (left) and <b>9e</b> (right) against <i>P. aeruginosa</i> PAO1 at different concentrations. Positive control was bacteria only and negative control was media only. | <b>S9</b> |

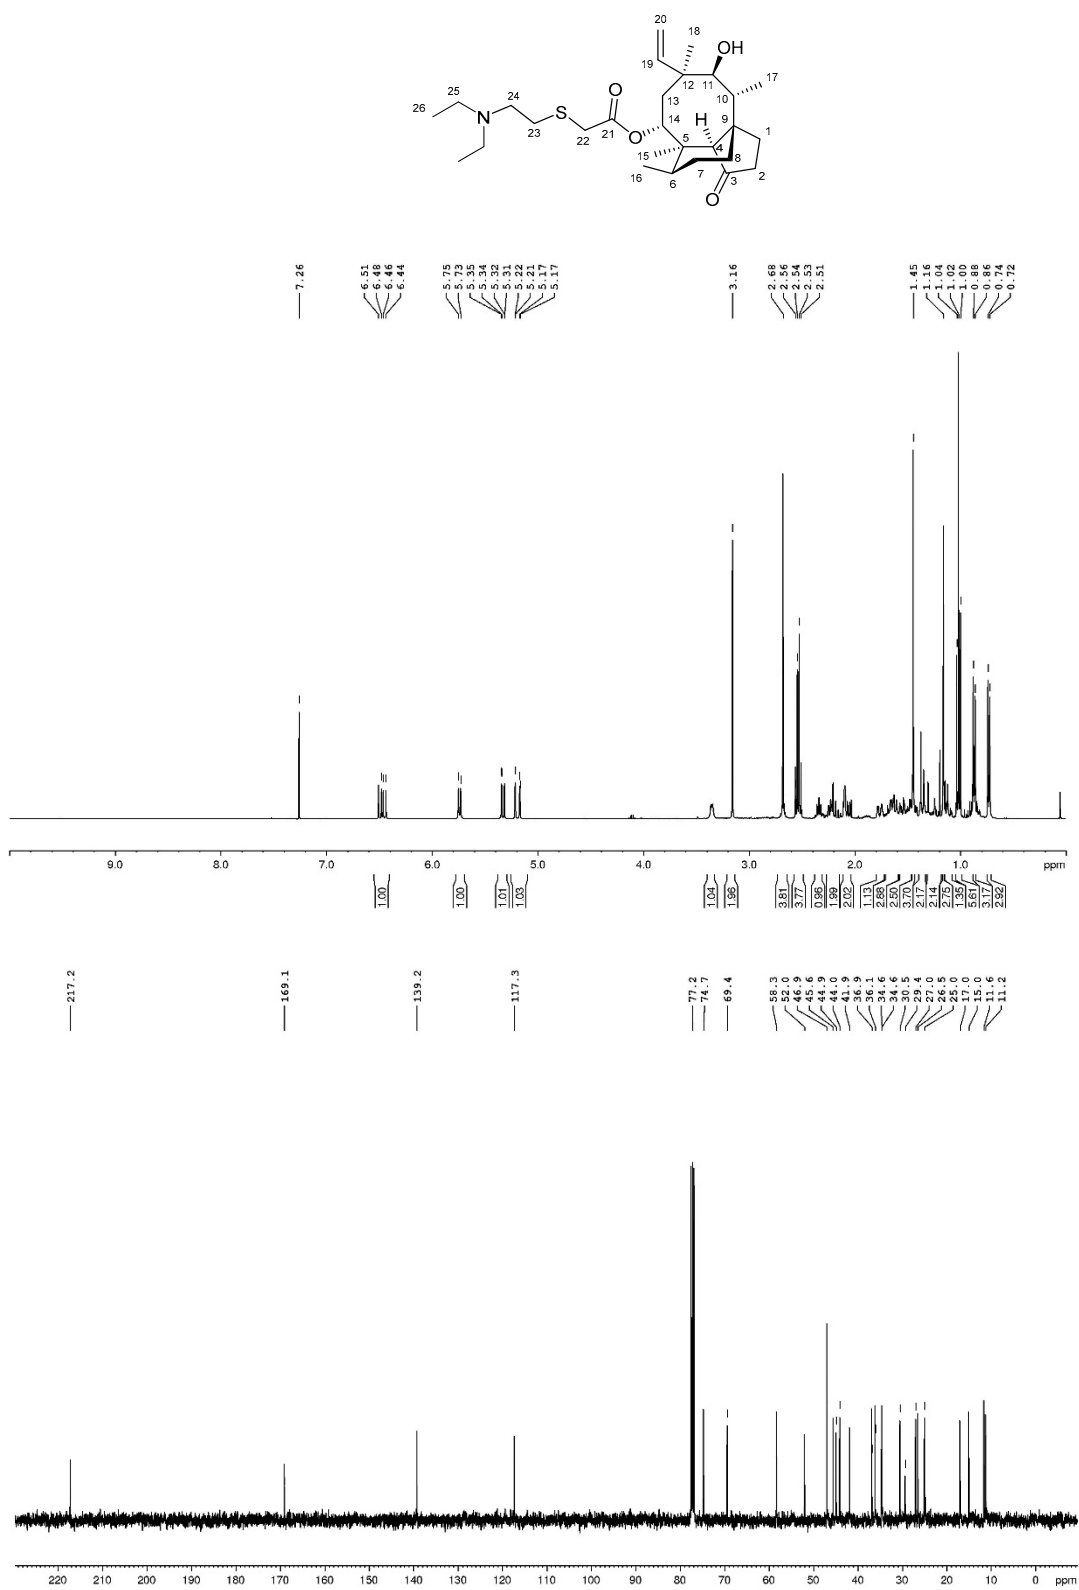

**Figure S1**  $^1\text{H}$  ( $\text{CDCl}_3$ , 400 MHz) and  $^{13}\text{C}$  ( $\text{CDCl}_3$ , 100 MHz) NMR spectra for **2**.

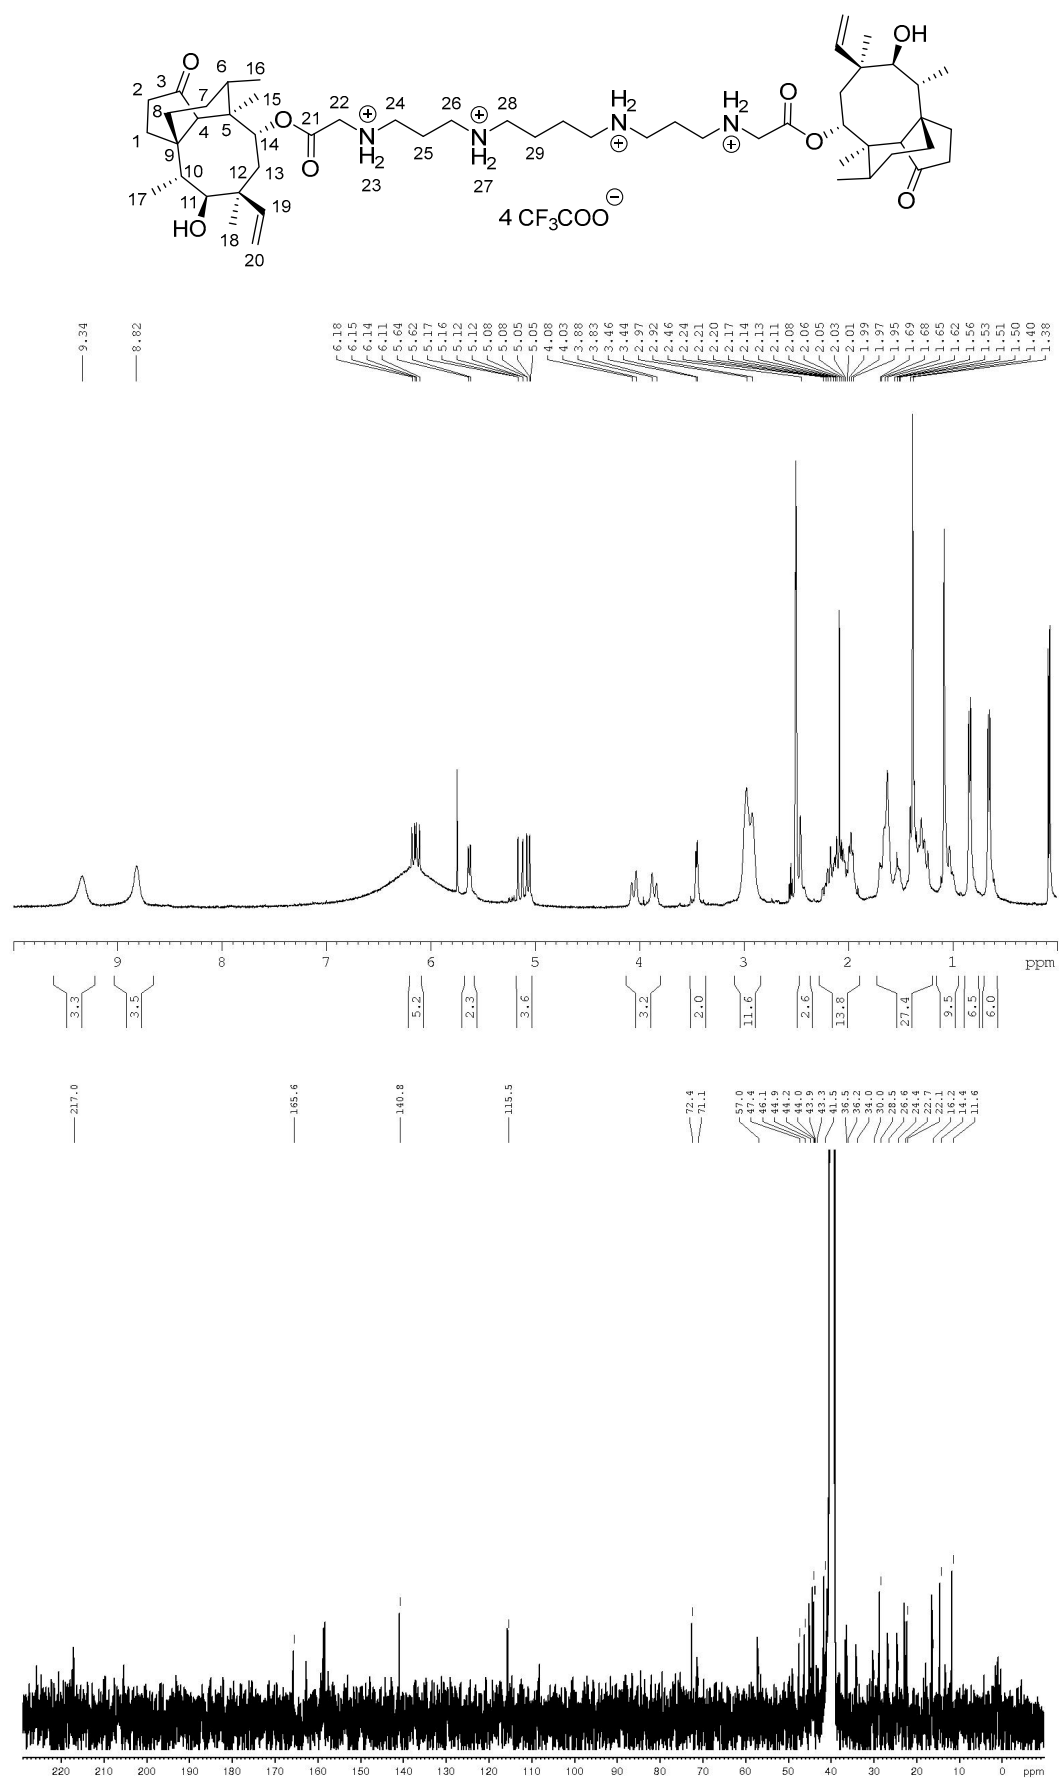

Figure S2  $^1\text{H}$  ( $\text{DMSO-}d_6$ , 400 MHz) and  $^{13}\text{C}$  ( $\text{DMSO-}d_6$ , 100 MHz) NMR spectra for **9a**.

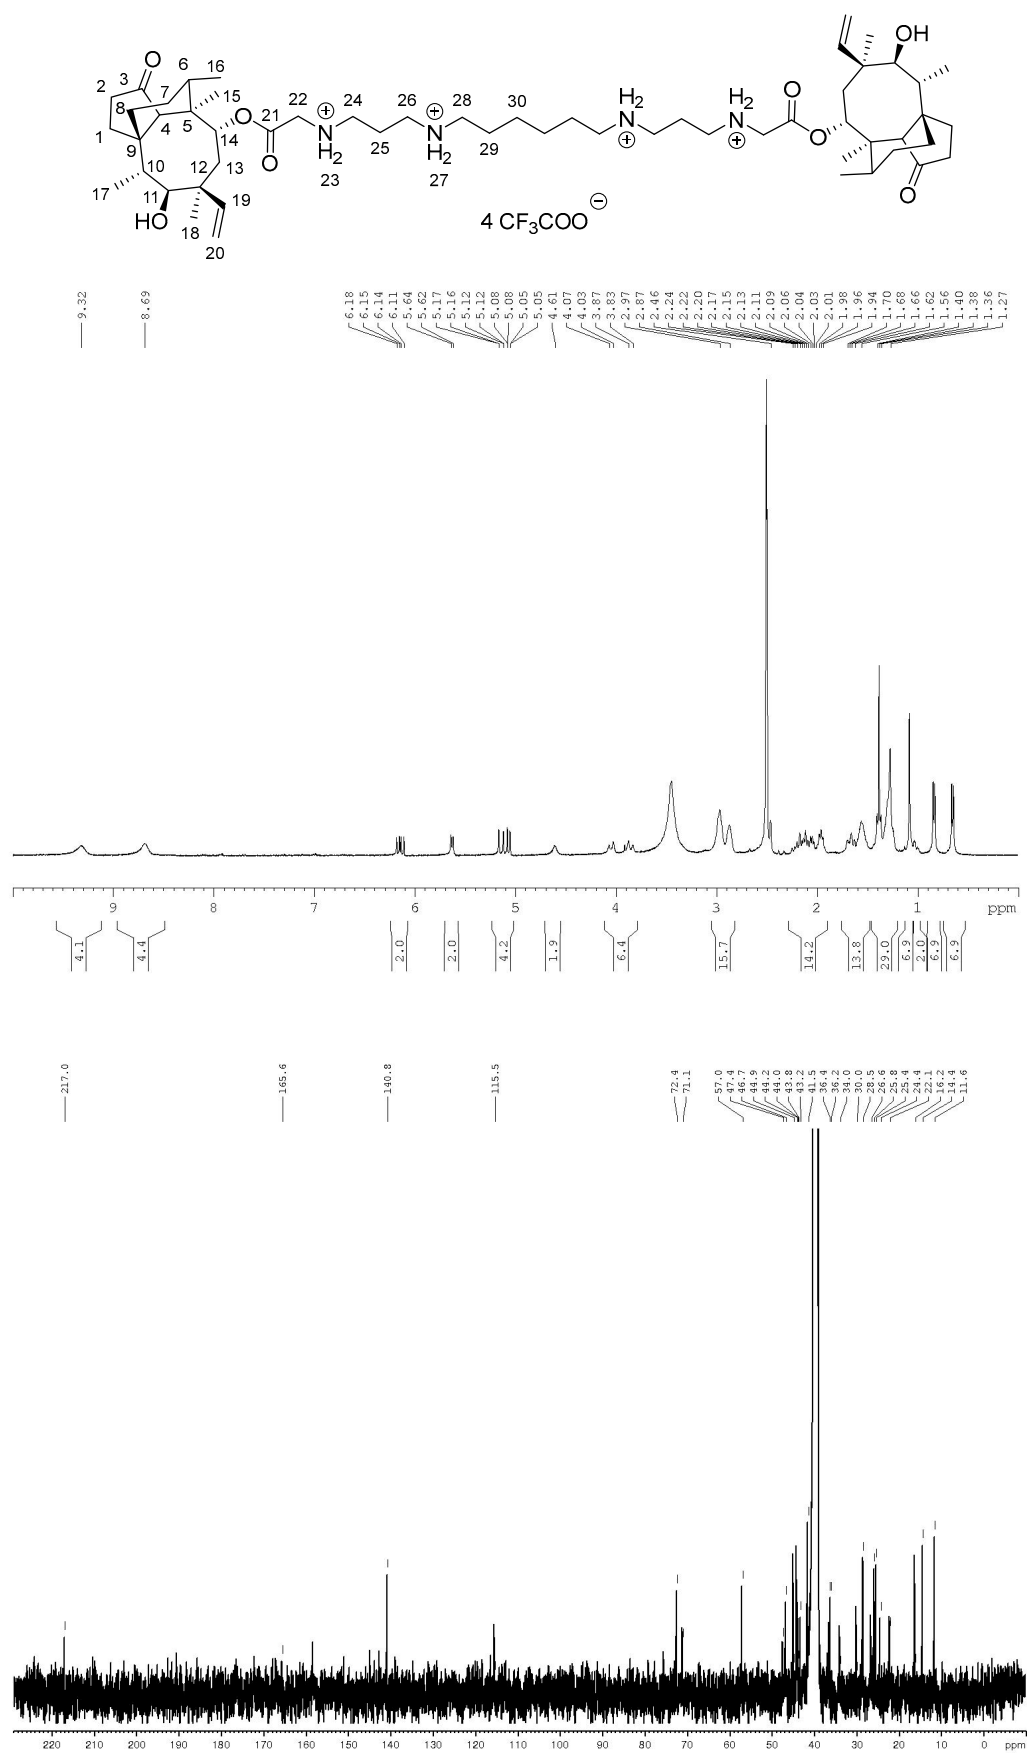

Figure S3  $^1\text{H}$  (DMSO- $d_6$ , 400 MHz) and  $^{13}\text{C}$  (DMSO- $d_6$ , 100 MHz) NMR spectra for **9b**.

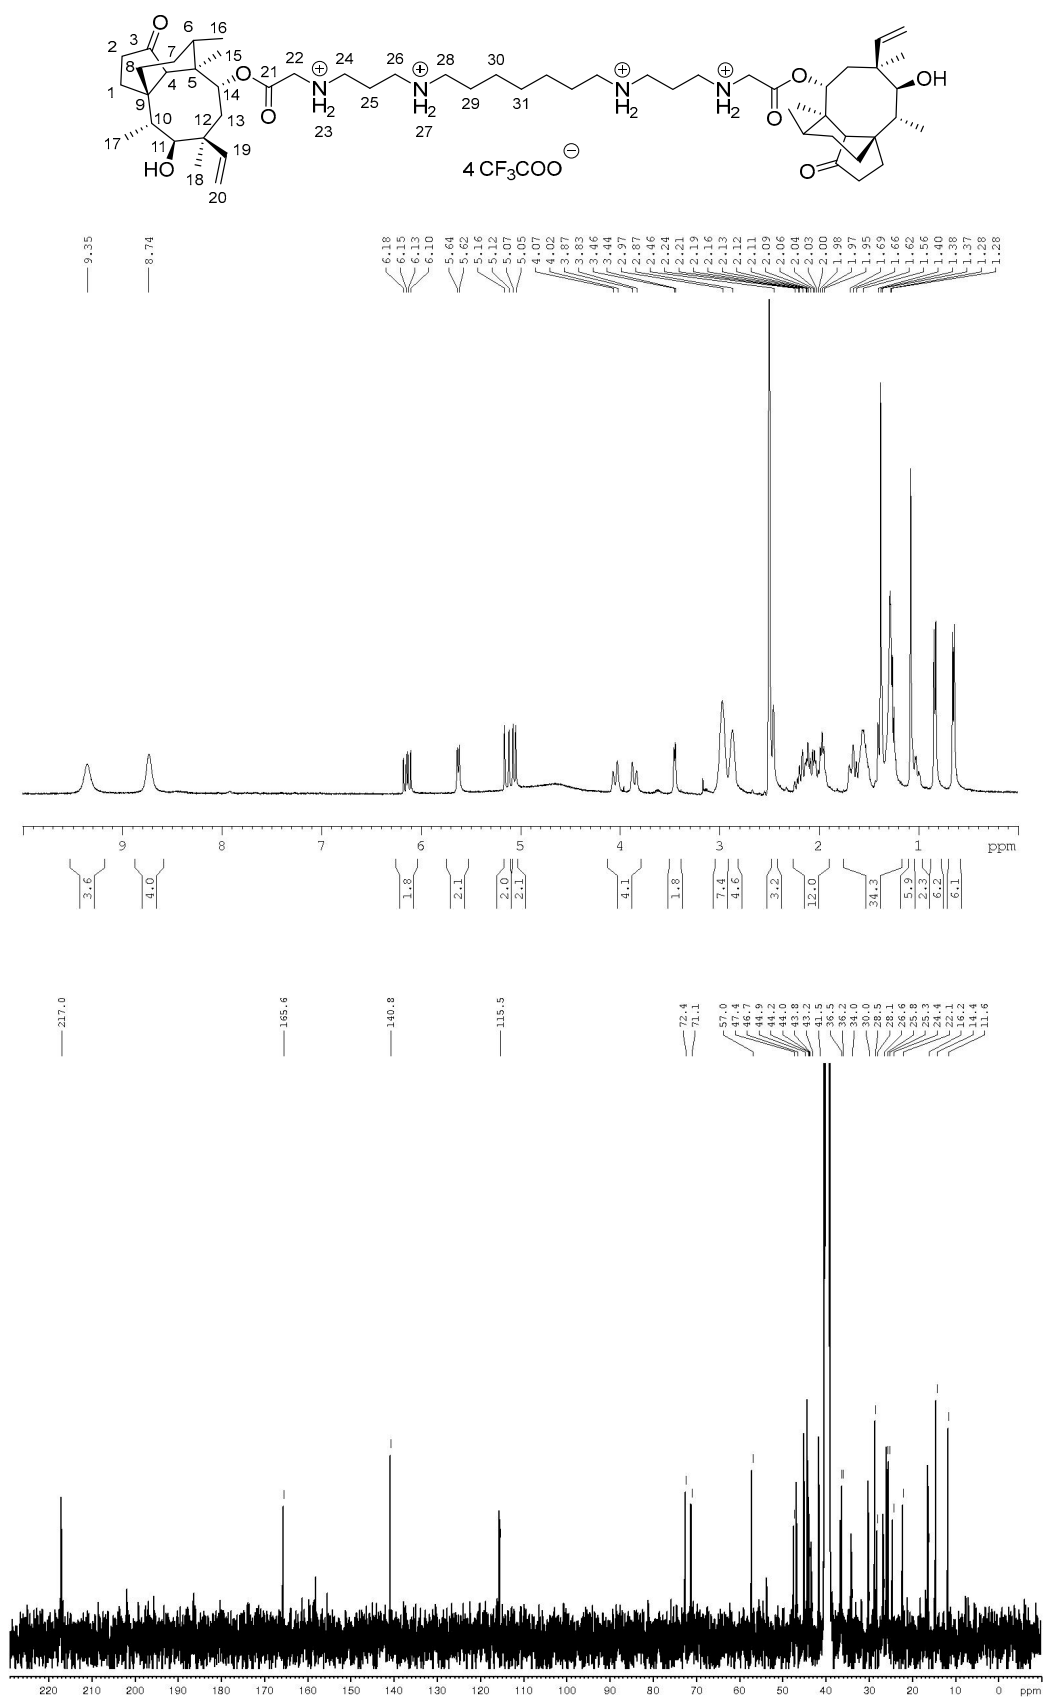

Figure S4  $^1\text{H}$  (DMSO- $d_6$ , 400 MHz) and  $^{13}\text{C}$  (DMSO- $d_6$ , 100 MHz) NMR spectra for **9c**.

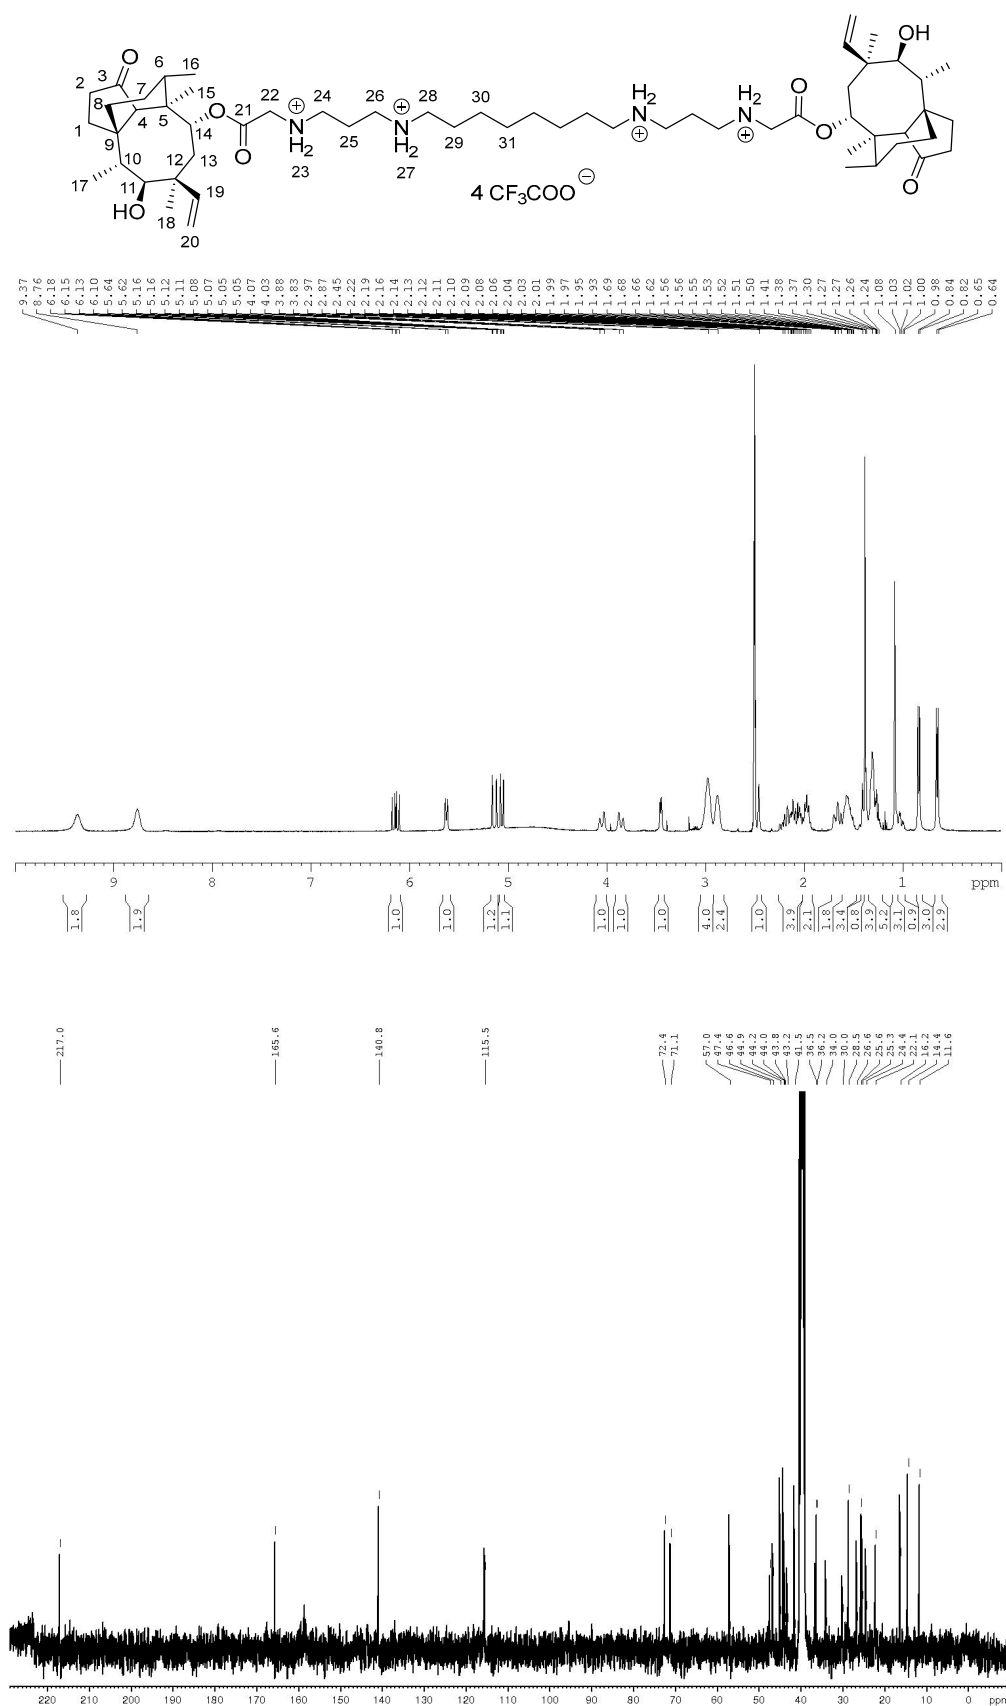

Figure S5 <sup>1</sup>H (DMSO-*d*<sub>6</sub>, 400 MHz) and <sup>13</sup>C (DMSO-*d*<sub>6</sub>, 100 MHz) NMR spectra for 9d.

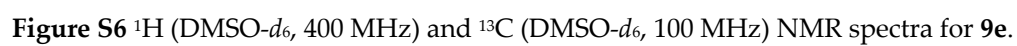

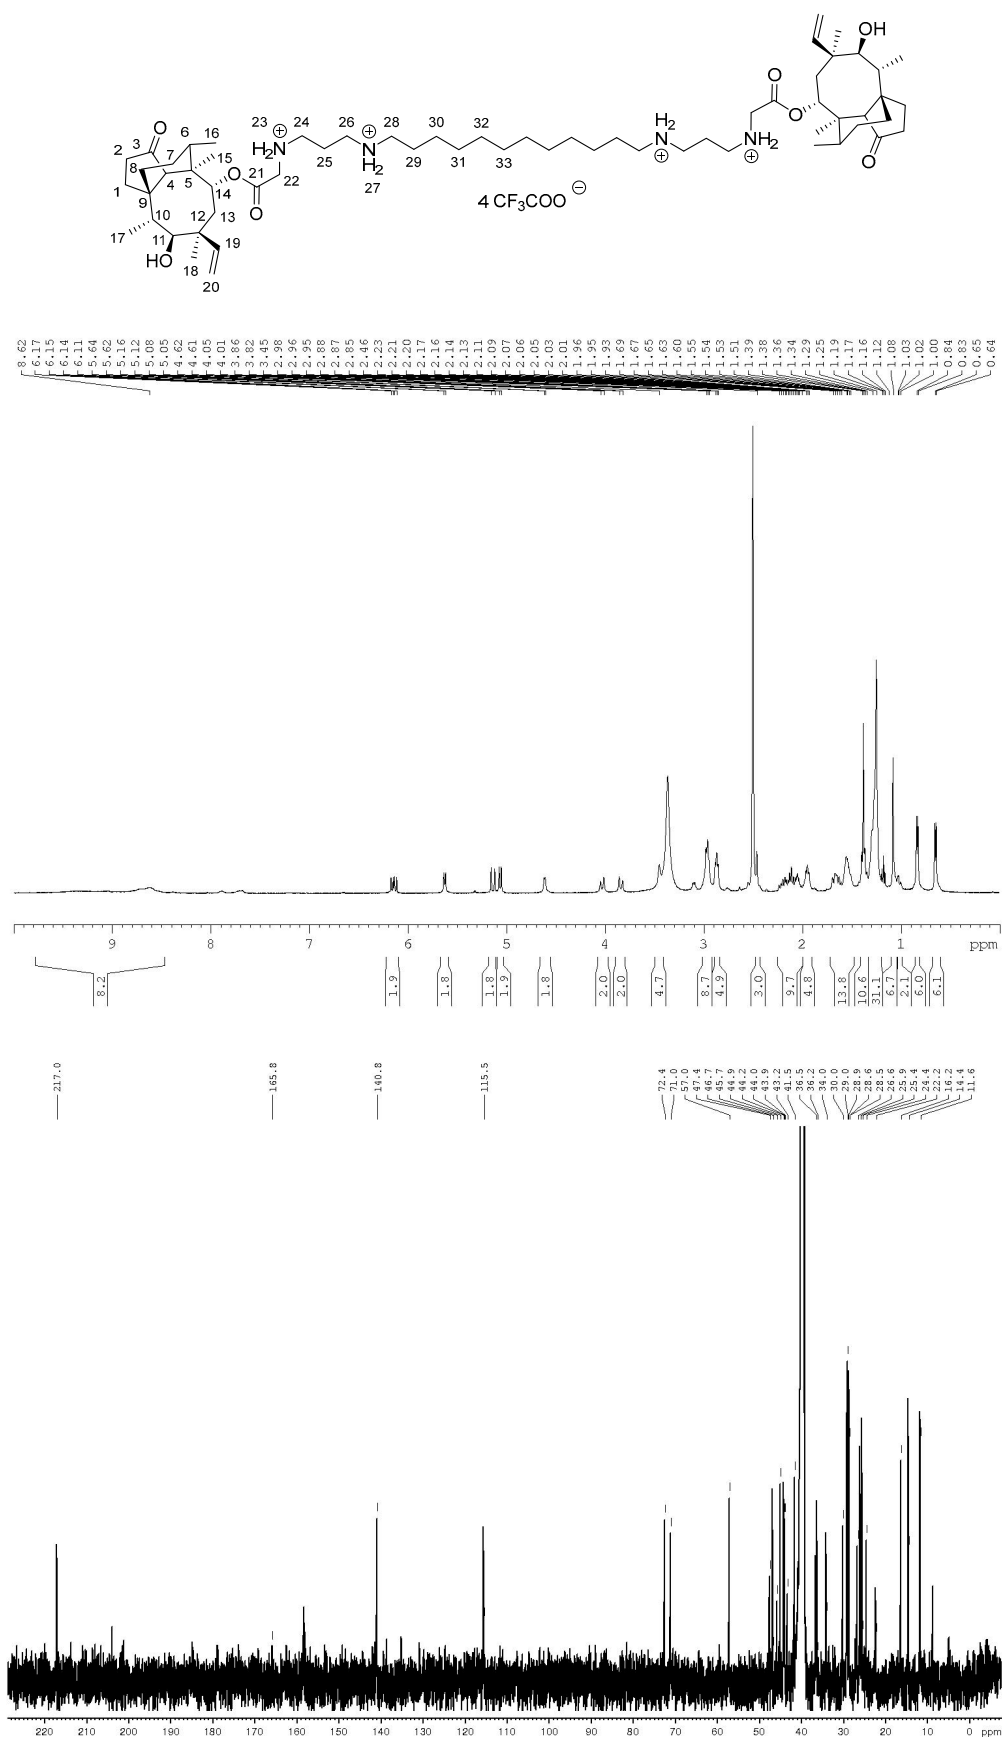

Figure S7 <sup>1</sup>H (DMSO-*d*<sub>6</sub>, 500 MHz) and <sup>13</sup>C (DMSO-*d*<sub>6</sub>, 125 MHz) NMR spectra for **9f**.



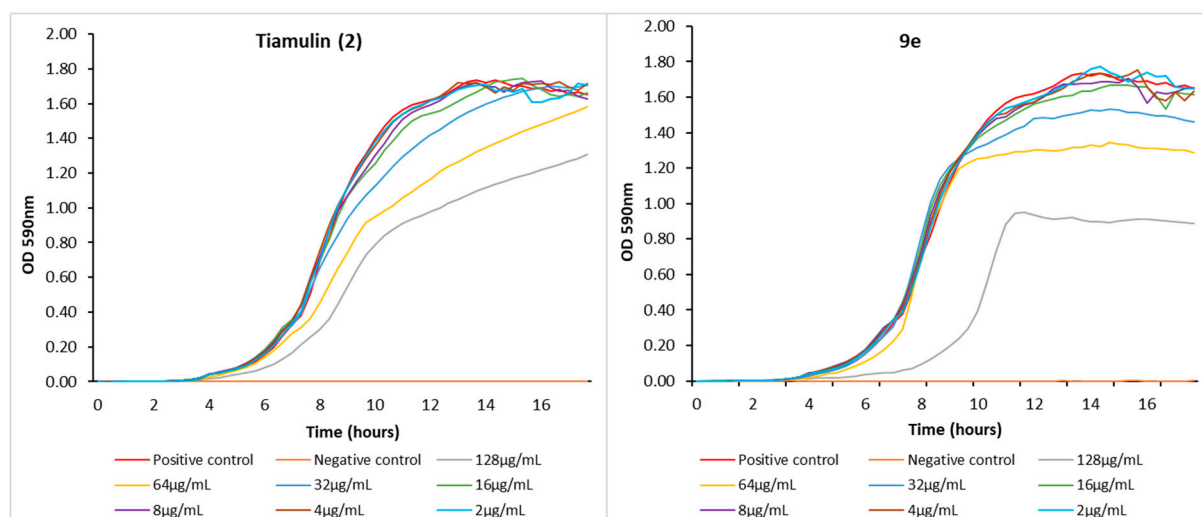

**Figure S8** Bacterial growth inhibition exhibited by **2** (left) and **9e** (right) against *P. aeruginosa* PAO1 at different concentrations. Positive control was bacteria only and negative control was media only.
